# Supplementary material
Source: PubMed Central journal article supplement (PMC3563353)
Supplement: NIHMS420315-supplement-1_si_001.pdf [file NIHMS420315-supplement-1_si_001.pdf]

## Synthesis and Characterization of a Melanoma-Targeted Fluorescence Imaging Probe by Conjugation of a Melanocortin 1 Receptor (MC1R) Specific Ligand

Narges K Tafreshi<sup>†</sup>, Xuan Huang<sup>†</sup>, Valerie E Moberg<sup>†</sup>, Natalie M. Barkey<sup>†</sup>, Vernon K. Sondak<sup>‡</sup>, Haibin Tian<sup>†</sup>, David L Morse<sup>†\*</sup> and Josef Vagner<sup>§\*</sup>

**Authors' Affiliations:** <sup>†</sup>Dept. Cancer Imaging and Metabolism, <sup>‡</sup>Department of Cutaneous Oncology, H. Lee Moffitt Cancer Center & Research Institute, Tampa, FL; <sup>§</sup>BIO5 Institute, University of Arizona, Tucson, AZ

\*Corresponding Authors: J. V., The BIO5 Institute, University of Arizona, 1657 E Helen Street, Tucson, Arizona 85721, Phone 520-626-4179, fax 520-626-4824; e-mail [vagner@email.arizona.edu](mailto:vagner@email.arizona.edu); and D.L.M., H. Lee Moffitt Cancer Center and Research Institute, 12902 Magnolia Drive, Tampa, FL 33612; [David.Morse@moffitt.org](mailto:David.Morse@moffitt.org)

Supporting Information:

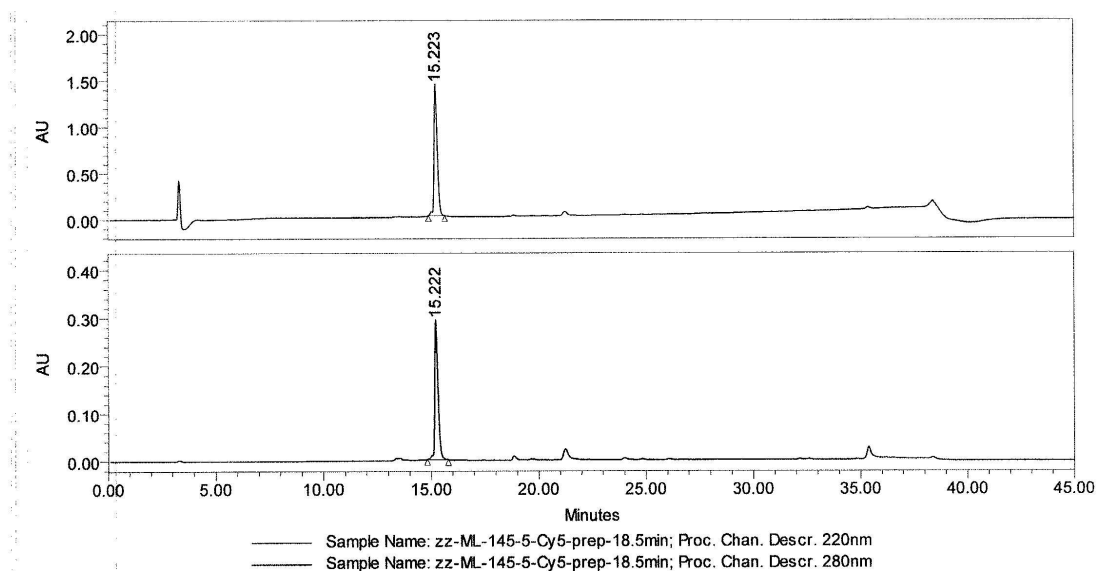

**Channel 220 nm**  
**Channel: 2487Channel 1**

|          | <b>RT</b>     | <b>Area<br/>(<math>\mu\text{V}\cdot\text{sec}</math>)</b> | <b>% Area</b> | <b>Channel</b>       |
|----------|---------------|-----------------------------------------------------------|---------------|----------------------|
| <b>1</b> | <b>15.223</b> | <b>1.50e+007</b>                                          | <b>100.00</b> | <b>2487Channel 1</b> |

**Channel 280 nm**  
**Channel: 2487Channel 2**

|          | <b>RT</b>     | <b>Area<br/>(<math>\mu\text{V}\cdot\text{sec}</math>)</b> | <b>% Area</b> | <b>Channel</b>       |
|----------|---------------|-----------------------------------------------------------|---------------|----------------------|
| <b>1</b> | <b>15.222</b> | <b>3.15e+006</b>                                          | <b>100.00</b> | <b>2487Channel 2</b> |

Figure S1. HPLC of the MC1RL-Cy5 compound.

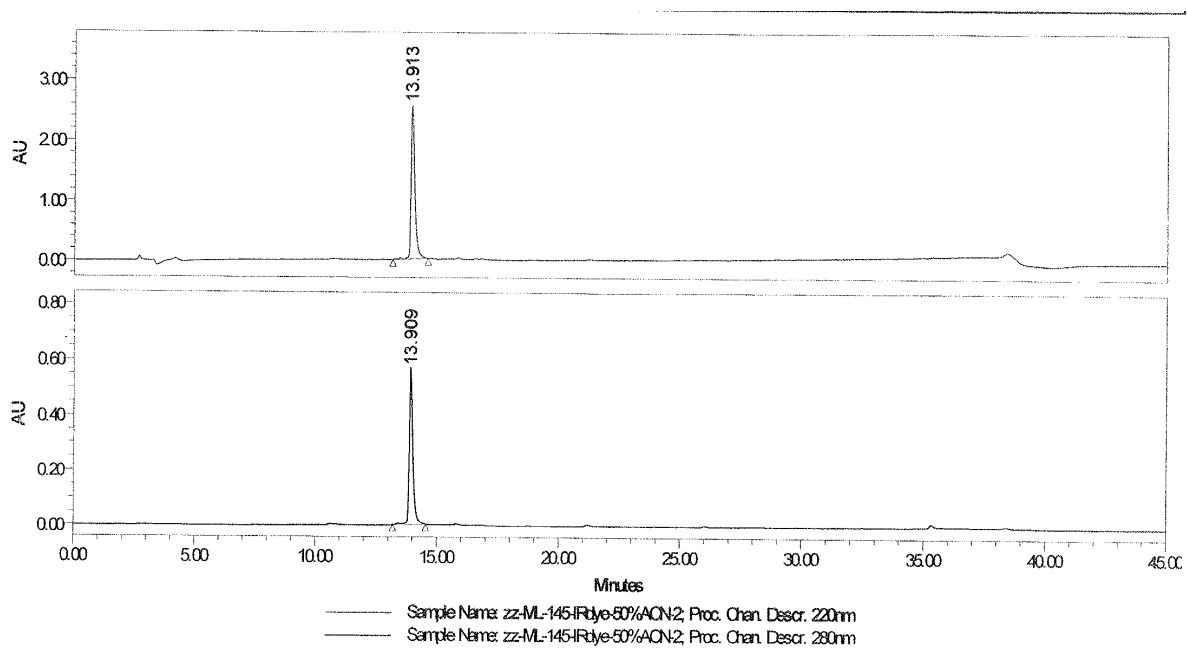

**Channel 220 nm**  
**Channel: 2487Channel 1**

|   | RT     | Area<br>( $\mu\text{V}^2\text{sec}$ ) | %Area  | Channel       |
|---|--------|---------------------------------------|--------|---------------|
| 1 | 13.913 | 2.90e+007                             | 100.00 | 2487Channel 1 |

**Channel 280 nm**  
**Channel: 2487Channel 2**

|   | RT     | Area<br>( $\mu\text{V}^2\text{sec}$ ) | %Area  | Channel       |
|---|--------|---------------------------------------|--------|---------------|
| 1 | 13.909 | 6.18e+006                             | 100.00 | 2487Channel 2 |

Figure S2. HPLC of the MC1RL-800 compound.
